# Supplementary material for: Home-Use and Portable Biofeedback Lowers Anxiety and Pain in Chronic Pain Subjects
Source: PubMed Central journal article supplement (PMC11562280; doi:10.1177/15598276231221112), 2023-12-12

| Study # | Subject with Chronic Pain Type                   | Demographic Information |     |           | Duration of Pain            | Maximum pain during a typical week * | Average pain during a typical week* | Minimum pain during a typical week* | # of Medications taken and type (optional) |
|---------|--------------------------------------------------|-------------------------|-----|-----------|-----------------------------|--------------------------------------|-------------------------------------|-------------------------------------|--------------------------------------------|
|         |                                                  | Age                     | Sex | Race      |                             |                                      |                                     |                                     |                                            |
| 1       | Right Arm, Right Leg                             | 30                      | F   | Caucasian | 19 years                    | 8                                    | 5                                   | 0                                   | 0                                          |
|         | Fibromyalgia, Neck, Shoulders, Back, Legs, Hands | 21                      | F   | Caucasian | 11 years, 4 years diagnosed | 10                                   | 7                                   | 4                                   | Unknown                                    |
|         | Bilateral lower back                             | 39                      | M   | Caucasian | 8 years                     | 9                                    | 8                                   | 7                                   | 1 methocarbamol                            |
|         | Right hip                                        | 43                      | F   | Caucasian | 10 years                    | 8                                    | 5                                   | 3                                   | 0                                          |
|         | Lower back, diagnosed with root compression      | 33                      | M   | Caucasian | 12 years                    | 5                                    | 3                                   | 1                                   | Unknown                                    |
|         | Fibromyalgia, Migraines                          | 56                      | F   | Caucasian | 30 years                    | 7                                    | 6                                   | 3                                   | 2 Norco, Gabapentin                        |
|         | Bilateral lower back                             | 60                      | M   | Caucasian | 40 years                    | 8                                    | 4                                   | 2                                   | 0                                          |
| 2       | Fibromyalgia and Migraines                       | 20                      | F   | Caucasian | 10 years                    | 8                                    | 5                                   | 3                                   | Unknown                                    |
|         | Lower back                                       | 43                      | M   | Caucasian | 4 years                     | 5                                    | 3                                   | 0                                   | 2 Tylenol and Ibuprofen                    |
|         | Lower back, Neck, Migraines                      | 58                      | F   | Caucasian | Over 20 years               | 8                                    | 5                                   | 4                                   | 1 unspecified muscle relaxant              |
|         | Lower back, Pelvic                               | 41                      | M   | Caucasian | 9 months                    | 8                                    | 6                                   | 5                                   | 2: Lyrica, Gabapentin                      |
|         | Lower back, Beck, Migraines                      | 52                      | M   | Caucasian | 20 years                    | 9                                    | 5                                   | 3                                   | 2: Botox, Aimovig                          |
|         | Fibromyalgia                                     | 18                      | M   | Asian     | 4 years                     | 5                                    | 3                                   | 0                                   | 1 Motrin                                   |
| 3       | Back, Migraines, Rheumatoid Arthritis            | 54                      | F   | Caucasian | 10 years, and 6 years       | 8                                    | 6                                   | 2                                   | Unknown                                    |
|         | Lower back, Rheumatoid Arthritis                 | 57                      | F   | Caucasian | 5 years                     | 8                                    | 6                                   | 5                                   | 1 Ibuprofen                                |
|         | Lower back                                       | 41                      | M   | Caucasian | 5 years                     | 10                                   | 6                                   | 3                                   | 2 Tylenol, Motrin, herbal treatment        |
|         | Pelvic, TMJ, Fibromyalgia                        | 57                      | F   | Caucasian | Over 25 years               | 10                                   | 7                                   | 6                                   | 1 Celebrex, herbal treatment               |
|         | Arthritis, Pelvic Pain                           | 60                      | F   | Caucasian | Over 5 years                | 3                                    | 3                                   | 3                                   | Unknown                                    |
|         | Painful Bladder Syndrome                         | 28                      | F   | Caucasian | 1 year                      | 8                                    | 6                                   | 2                                   | 3: Uribel, Ibuprofen, Naproxen             |
|         | Neck, upper, and lower back                      | 23                      | F   | Asian     | 3 years                     | 7                                    | 4                                   | 2                                   | 0                                          |
|         | Lower back                                       | 45                      | F   | Black     | 2 years                     | 6                                    | 4                                   | 3                                   | 0                                          |
|         | Joint Pain, Migraines                            | 48                      | F   | Caucasian | Over 20 years               | 10                                   | 8                                   | 7                                   | Unknown                                    |

**Supplemental Table 1.** Demographic information for studies 1, 2, and 3.

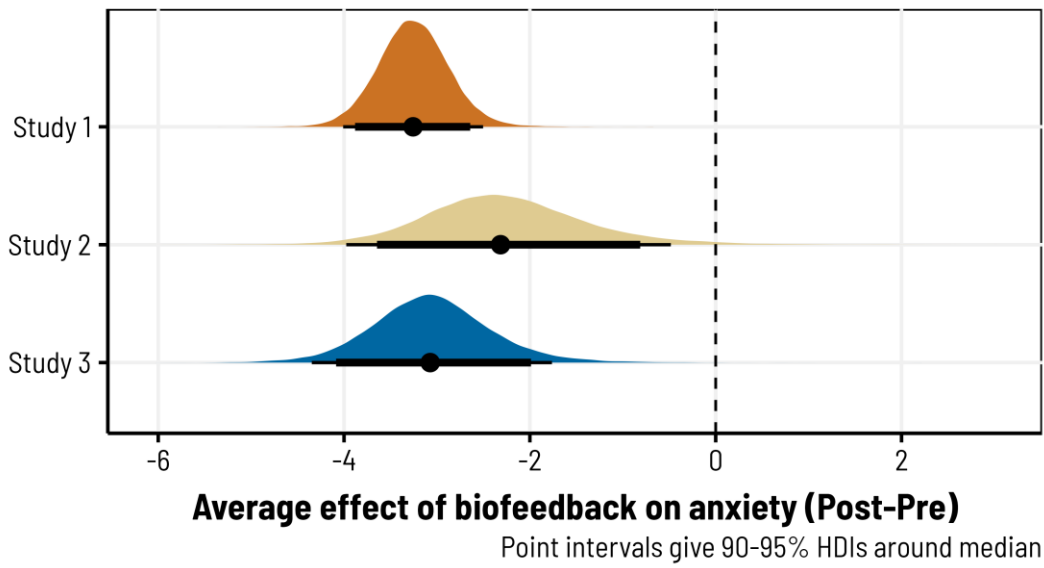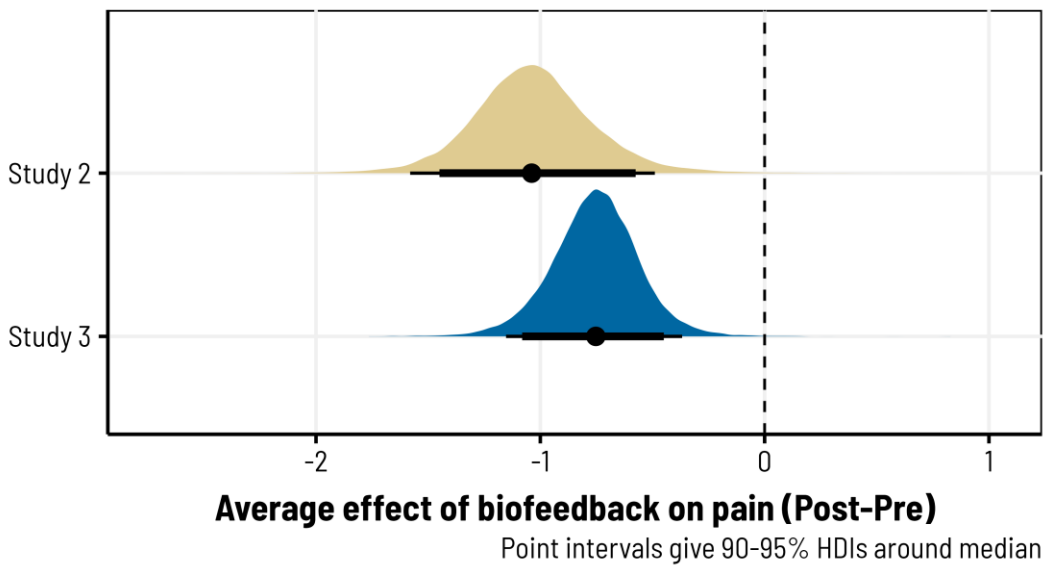

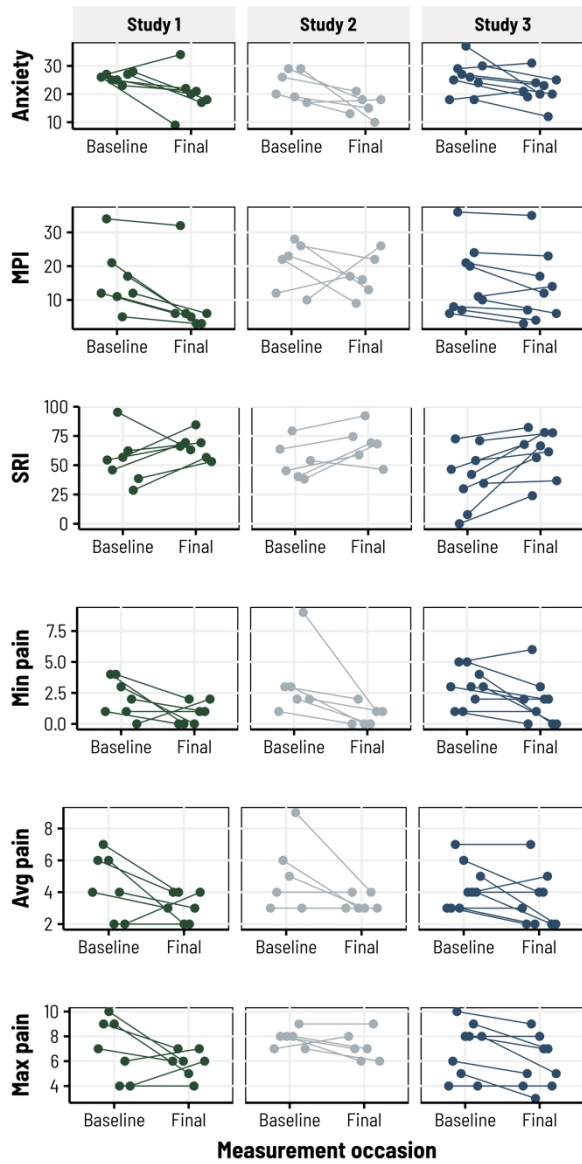

Supplement: sj-pdf-1-ajl-10.1177_15598276231221112.pdf [file sj-pdf-1-ajl-10.1177_15598276231221112.pdf]
